# Supplementary material
Source: Springer Nature journal article supplement (https://www.springermedizin.de/resource/supplementary/12904_2012_150_MOESM2_ESM.pdf/9517720)

Figure 2: General overview of the 4 phases of the Flanders Study to develop Quality Indicators for Palliative Care

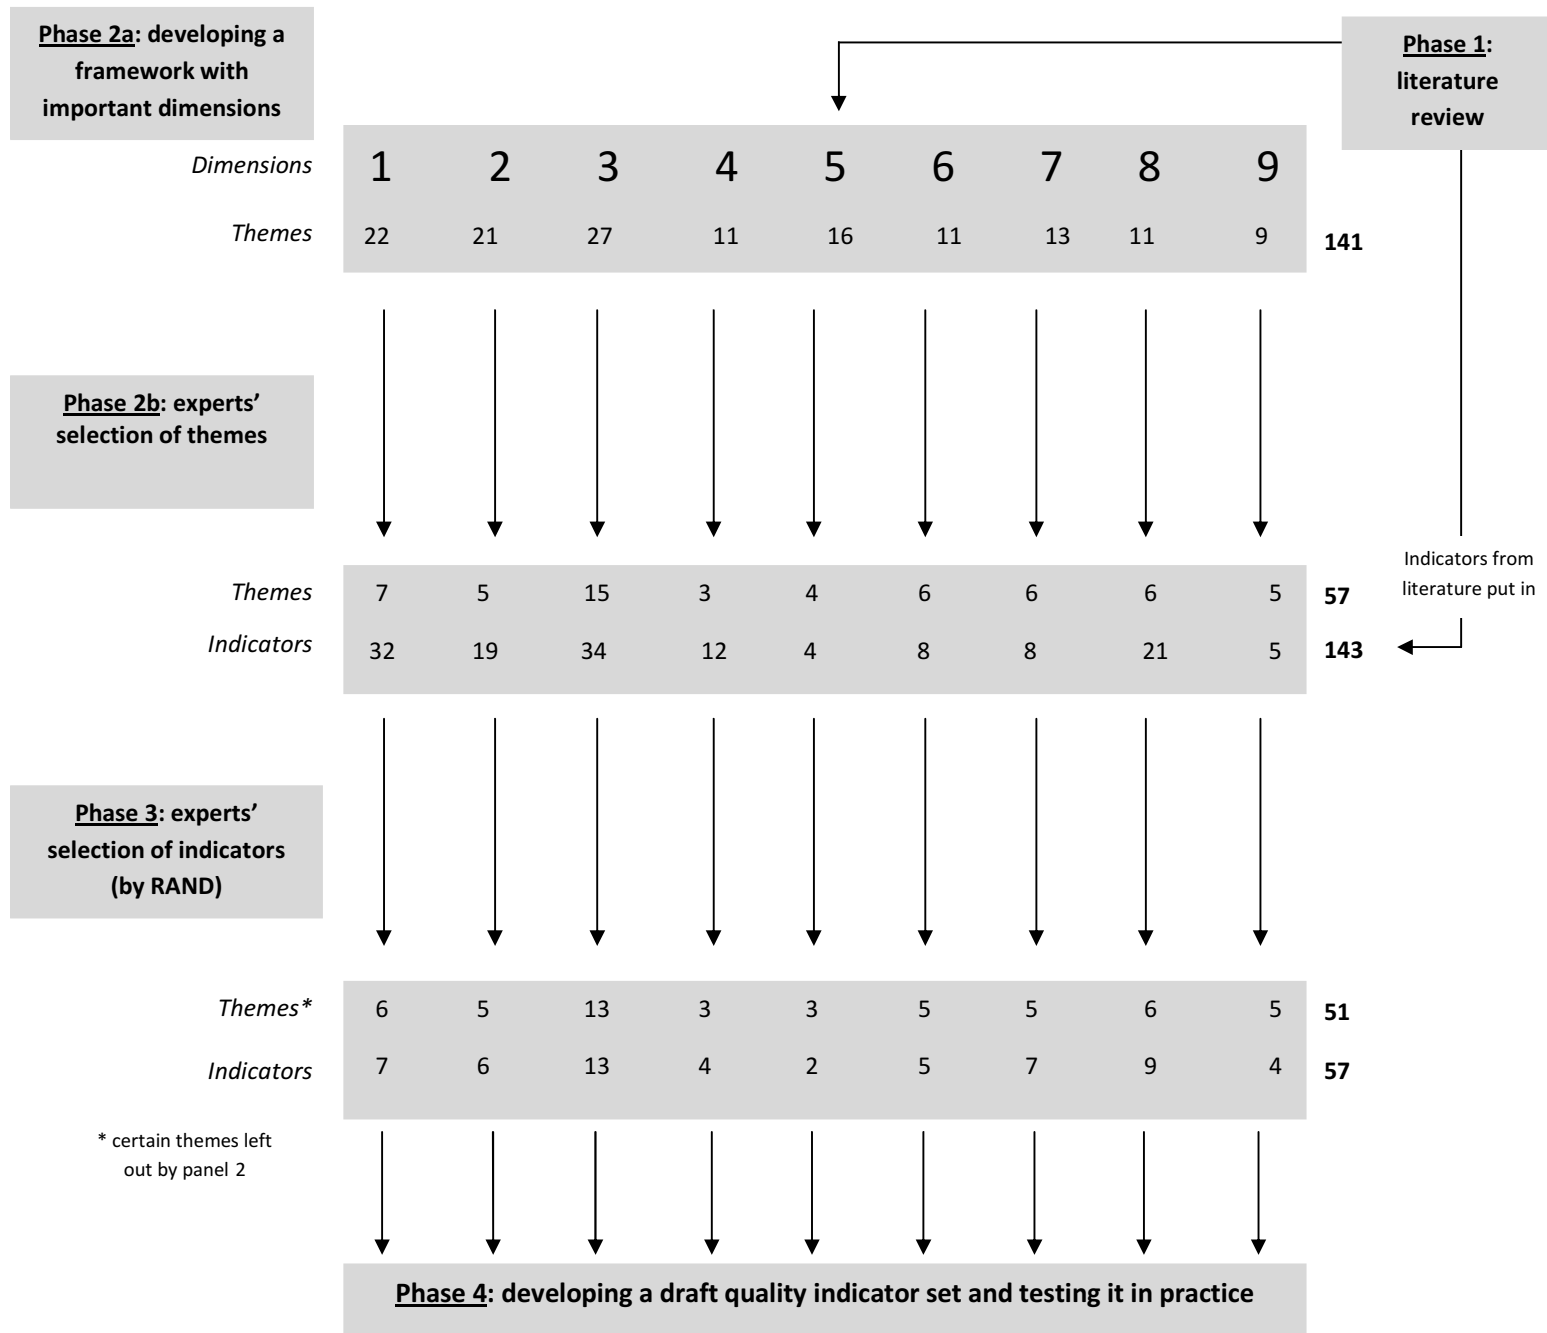

Supplement: MOESM2 [file 9517720]
